# Supplementary material
Source: MDPI journal article supplement (https://www.mdpi.com/2073-4395/9/3/136)
Supplement: s1 [file s1]

Table S1 Standard error of the mean (SEM) and *F*-test results of the crude protein, mucilage and crude oil content of chia (Genotype G8) cultivated at three different row spacing (35, 50, 75 cm), sowing densities (1, 1.5, 2 kg ha<sup>-1</sup>) and fertilizer rates (0,20 40 kg N ha<sup>-1</sup>) at Ihinger Hof in 2016 and 2017 (n = 3,  $\alpha = 0.05$ ).

| Trait                  | $j_a$   | $b_{aj}$ | F-test   |                |
|------------------------|---------|----------|----------|----------------|
|                        |         |          | $\tau_k$ | $(j\tau)_{ak}$ |
| <b>Row spacing</b>     |         |          |          |                |
| Crude protein          | 0.0018  | 0.8438   | 0.2011   | 0.2527         |
| Mucilage               | <0.0001 | 0.8174   | 0.1933   | 0.0549         |
| Crude oil              | 0.188   | 0.2723   | 0.0216   | 0.9737         |
| <b>Sowing density</b>  |         |          |          |                |
| Crude protein          | <0.0001 | 0.7807   | 0.8068   | 0.0969         |
| Mucilage               | <0.0001 | 0.8471   | 0.0334   | 0.0003         |
| Crude oil              | 0.0020  | 0.1251   | 0.0309   | 0.0281         |
| <b>Fertilizer rate</b> |         |          |          |                |
| Crude protein          | <0.0001 | 0.2119   | 0.3625   | 0.6330         |
| Mucilage               | <0.0001 | 0.9137   | 0.0018   | 0.0584         |
| Crude oil              | <0.0001 | 0.0813   | 0.0009   | 0.6955         |

p-values from F-tests are based on model (2);  $j_a$  Annual effect;  $b_{aj}$  Block effect;  $\tau_k$  Treatment effect (row spacing, sowing density, fertilizer rate);  $(j\tau)_{ak}$  Interaction between treatment and annual effect. ter display: Estimates at a constant level of the treatment factor that share a capital letter do not differ significantly between years at  $\alpha = 0.05$ . Estimates within a year that share a small letter do not differ significantly between treatment factor levels at  $\alpha = 0.05$ .

Table S2 Mean estimates of fatty acid composition (% of total fatty acid) of chia (Genotypes G8) cultivated at three different levels of sowing density (1, 1.5, 2 kg ha<sup>-1</sup>) at Ihinger Hof in 2016 and 2017, along with standard error of the mean (SEM) and *F*-tests.

| Trait                    | Year 2016 |           |           | Year 2017 |           |           | <i>F</i> -test |         |          |          |                |
|--------------------------|-----------|-----------|-----------|-----------|-----------|-----------|----------------|---------|----------|----------|----------------|
|                          | 1         | 1.5       | 2         | 1         | 1.5       | 2         | SEM            | $j_a$   | $b_{aj}$ | $\tau_k$ | $(j\tau)_{ak}$ |
| Palmitic acid            | 6.90 A/a  | 7.08 A/a  | 7.08 A/a  | 6.67 B/a  | 6.71 B/a  | 6.82 B/a  | 0.077          | 0.0009  | 0.6144   | 0.1285   | 0.6539         |
| Stearic acid             | 3.45 A/a  | 3.49 A/a  | 3.40 A/a  | 2.99 B/a  | 3.10 B/a  | 3.21 B/a  | 0.069          | <0.0001 | 0.1646   | 0.4589   | 0.1855         |
| Oleic acid               | 7.46 A/a  | 7.59 A/a  | 7.43 A/a  | 5.82 B/a  | 5.94 B/a  | 6.05 B/a  | 0.177          | <0.0001 | 0.0986   | 0.1855   | 0.7268         |
| Vaccenic acid            | 0.82 A/a  | 0.77 A/a  | 0.75 A/a  | 0.80 A/a  | 0.79 A/a  | 0.79 A/a  | 0.026          | 0.5205  | 0.3167   | 0.0971   | 0.3661         |
| Linoleic acid            | 20.75 A/a | 21.15 A/a | 20.95 A/a | 20.07 B/a | 19.97 B/a | 19.75 B/a | 0.181          | <0.0001 | 0.0014   | 0.5471   | 0.3145         |
| $\alpha$ -Linolenic acid | 60.59 A/a | 59.91 A/a | 60.33 A/a | 63.66 B/a | 63.49 B/a | 63.39 Ba  | 0.488          | <0.0001 | 0.0048   | 0.6451   | 0.8329         |
| SFA                      | 10.35 A/a | 10.58 A/a | 10.48 A/a | 9.66 B/a  | 9.81 B/a  | 10.03 B/a | 0.129          | <0.0001 | 0.2659   | 0.1712   | 0.4705         |
| MUFA                     | 8.28 A/a  | 8.36 A/a  | 8.19 A/a  | 6.62 B/a  | 6.73 B/a  | 6.83 B/a  | 0.206          | <0.0001 | 0.0206   | 0.8634   | 0.7105         |
| PUFA                     | 81.34 A/a | 81.06 A/a | 81.30 A/a | 83.72 B/a | 83.46 B/a | 83.14 B/a | 0.464          | <0.0001 | 0.1839   | 0.1206   | 0.6752         |
| PUFA:SFA                 | 7.87 A/a  | 7.67 A/a  | 7.78 A/a  | 8.67 B/a  | 8.51 B/a  | 8.29 B/a  | 0.129          | <0.0001 | 0.2119   | 0.1985   | 0.4443         |
| $\omega$ 6: $\omega$ 3   | 0.34 A/a  | 0.35 A/a  | 0.35 A/a  | 0.32 B/a  | 0.32 B/a  | 0.31 B/a  | 0.006          | <0.0001 | 0.0011   | 0.6414   | 0.6074         |

Estimates, average standard errors of the mean (SEM) and *p*-values from *F*-tests are based on model (2);  $j_a$  Annual effect;  $b_{aj}$  Block effect;  $\tau_k$  Treatment effect (sowing density);  $(j\tau)_{ak}$  Interaction between treatment and annual effect; Letter display: Estimates at a constant level of the treatment factor that share a capital letter do not differ significantly between years at  $\alpha = 0.05$ . Estimates within a year that share a lowercase letter do not differ significantly between treatment factor levels at  $\alpha = 0.05$ .

ter display: Estimates at a constant level of the treatment factor that share a capital letter do not differ significantly between years at  $\alpha = 0.05$ . Estimates within a year that share a small letter do not differ significantly between treatment factor levels at  $\alpha = 0.05$ .

Table S3 Mean estimates of fatty acid composition (% of total fatty acid) of chia (Genotypes G8) cultivated at three different fertilizer rates (0, 20, 40 kg N ha<sup>-1</sup>) at Ihinger Hof in 2016 and 2017, along with standard error of the mean (SEM) and *F*-tests.

| Trait                    | Year 2016  |           |           | Year 2017 |           |           | SEM       | <i>F</i> -test |         |          |          |                |
|--------------------------|------------|-----------|-----------|-----------|-----------|-----------|-----------|----------------|---------|----------|----------|----------------|
|                          | Fertilizer | 0         | 20        | 40        | 0         | 20        |           | 40             | $j_a$   | $b_{aj}$ | $\tau_k$ | $(j\tau)_{ak}$ |
| Palmitic acid            |            | 7.10 A/a  | 7.48 A/a  | 7.35 A/a  | 6.72 B/a  | 6.72 B/a  | 6.98 B/a  | 0.089          | 0.0003  | 0.4926   | 0.0943   | 0.0944         |
| Stearic acid             |            | 3.61 A/a  | 3.75 A/a  | 3.72A/a   | 3.13 B/a  | 3.07 B/a  | 3.18 B/a  | 0.098          | <0.0001 | 0.3426   | 0.7174   | 0.6166         |
| Oleic acid               |            | 7.60 A/a  | 8.19 A/a  | 7.96 A/a  | 5.91 B/a  | 5.94 B/a  | 6.11 B/a  | 0.209          | <0.0001 | 0.0271   | 0.3133   | 0.4296         |
| Vaccenic acid            |            | 0.76 A/a  | 0.78 A/a  | 0.76 A/a  | 0.79 B/a  | 0.79 B/a  | 0.81 B/a  | 0.010          | 0.0182  | 0.9659   | 0.6623   | 0.1807         |
| Linoleic acid            |            | 21.20 A/a | 21.64 A/a | 21.51 A/a | 19.84 B/a | 19.81 B/a | 19.83 B/a | 0.324          | <0.0001 | 0.1812   | 0.9810   | 0.6368         |
| $\alpha$ -Linolenic acid |            | 59.72 A/a | 58.15 A/a | 58.70 A/a | 63.61 B/a | 63.67 B/a | 63.09 B/a | 0.192          | <0.0001 | 0.2232   | 0.1876   | 0.4191         |
| SFA                      |            | 10.71 A/a | 11.24 A/a | 11.07 A/a | 9.85 B/a  | 9.79 B/a  | 10.16 B/a | 0.167          | <0.0001 | 0.3733   | 0.2211   | 0.2129         |
| MUFA                     |            | 8.37 A/a  | 8.97 A/a  | 8.72 A/a  | 6.70 B/a  | 6.73 B/a  | 6.92 B/a  | 0.211          | <0.0001 | 0.0300   | 0.3041   | 0.4010         |
| PUFA                     |            | 80.91 A/a | 79.79 A/a | 80.21 A/a | 83.45 B/a | 83.48 B/a | 82.92 B/a | 0.364          | <0.0001 | 0.1013   | 0.2554   | 0.2858         |
| PUFA:SFA                 |            | 7.58 A/a  | 7.10 A/a  | 7.25 A/a  | 8.47 B/a  | 8.53 B/a  | 8.17 B/a  | 0.154          | <0.0001 | 0.3185   | 0.2100   | 0.2083         |
| $\omega$ 6: $\omega$ 3   |            | 0.36 A/a  | 0.37 A/a  | 0.37 A/a  | 0.31 B/a  | 0.31 B/a  | 0.31 B/a  | 0.006          | <0.0001 | 0.1804   | 0.5279   | 0.5498         |

Estimates, average standard errors of the mean (SEM) and *p*-values from *F*-tests are based on model (2);  $j_a$  Annual effect;  $b_{aj}$  Block effect;  $\tau_k$  Treatment effect (fertilizer rate);  $(j\tau)_{ak}$  Interaction between treatment and annual effect; Letter display: Estimates at a constant level of the treatment factor that share a capital letter do not differ significantly between years at  $\alpha = 0.05$ . Estimates within a year that share a lowercase letter do not differ significantly between treatment factor levels at  $\alpha = 0.05$ .
